# Supplementary material for: Versatile hierarchical Cu/Fe3O4 nanocatalysts for efficient degradation of organic dyes prepared by a facile, controllable hydrothermal method
Source: Royal Society of Chemistry journal article supplement (doi:10.1039/c5ra16027h), 2015-01-01
Supplement: c5ra16027h2.pdf [file c5ra16027h2.pdf]

## **Supporting Information**

# **Versatile Hierarchical Cu/Fe<sub>3</sub>O<sub>4</sub> Nanocatalysts for Efficient Degradation of Organic Dyes Prepared by Facile, Controllable Hydrothermal Method**

Zhenzhen Wang, Shangru Zhai,\* Jialing Lv, Haixin Qi, Wei Zheng, Bin Zhai and Qingda An\*

Faculty of Light Industry and Chemical Engineering, Dalian Polytechnic University, Dalian 116034,

China

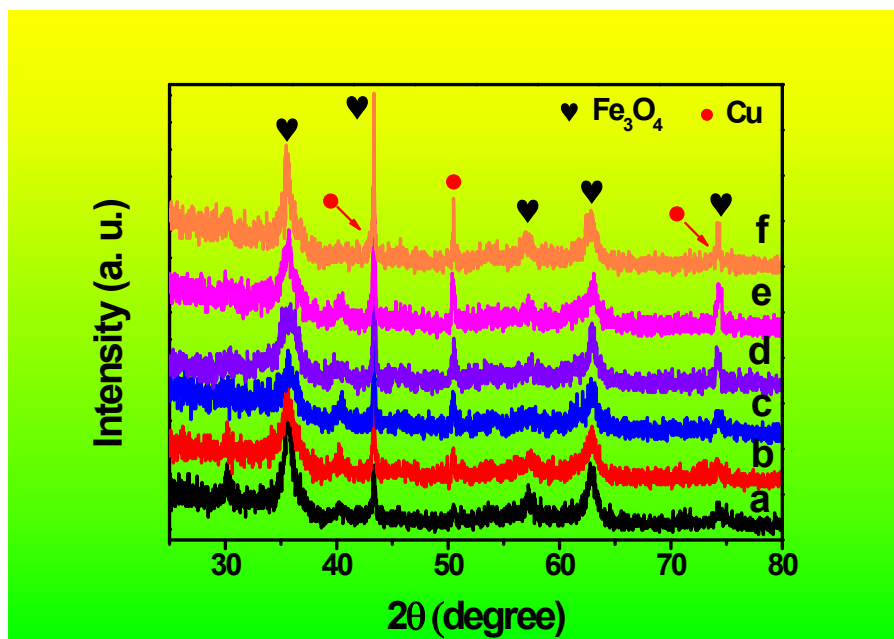

**Fig. S1** XRD patterns of Cu/Fe<sub>3</sub>O<sub>4</sub> with different initial addition amount of Cu precursor: (a) 0.1 mM, (b) 0.3 mM, (c) 0.5 mM, (d) 0.7 mM, (e) 1.0 mM, (f) 1.3 mM.

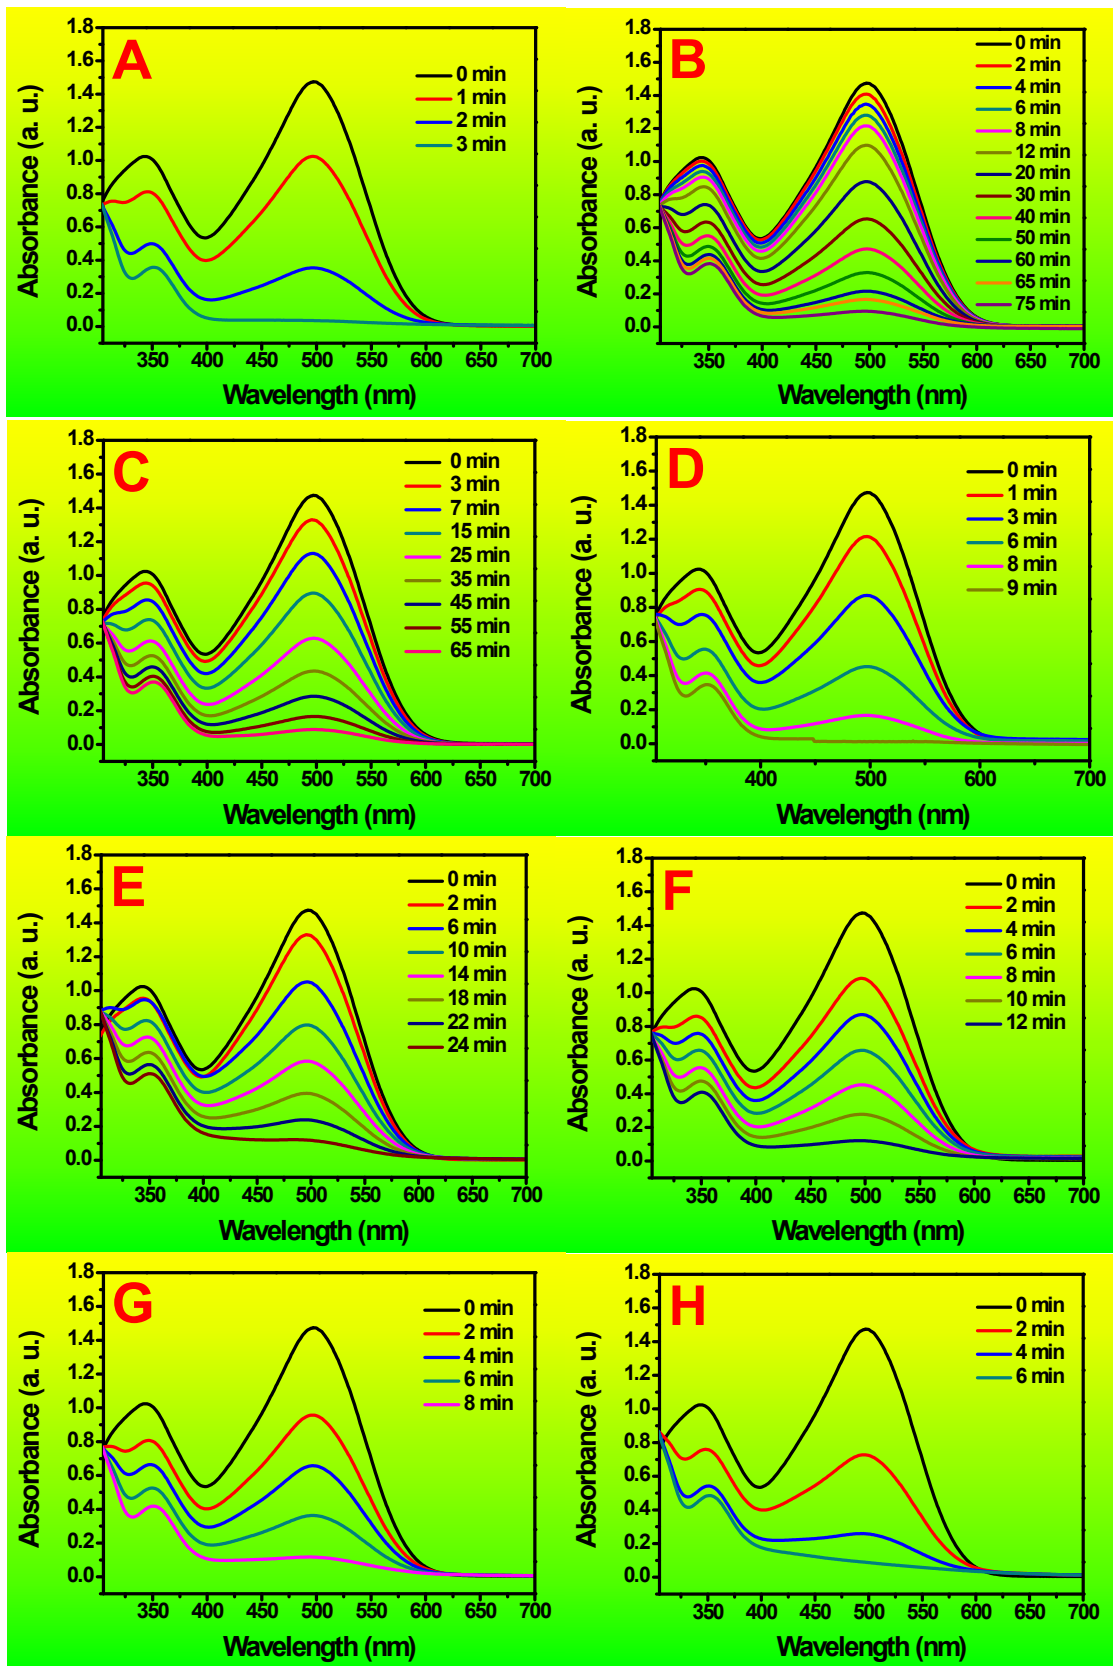

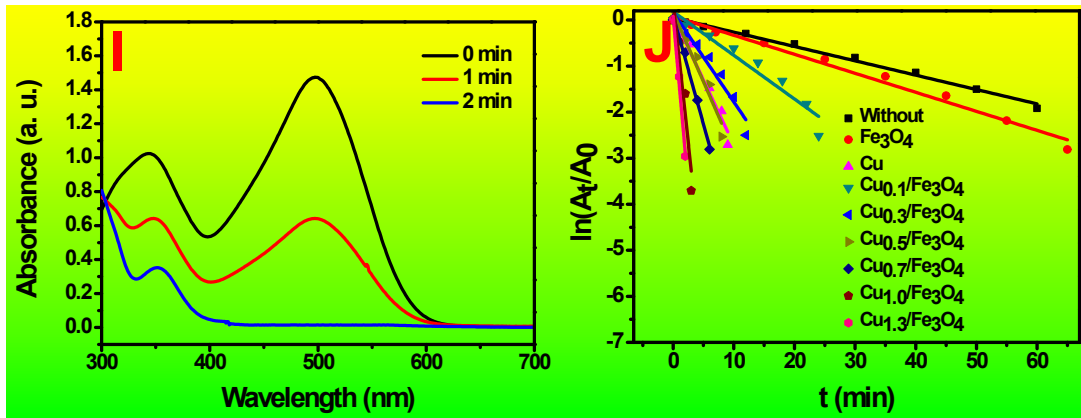

**Fig. S2** Time-dependent UV-vis absorption spectra of CR in the presence of  $\text{Cu}/\text{Fe}_3\text{O}_4$  (A), without catalyst (B); with  $\text{Fe}_3\text{O}_4$  as catalyst (C); with Cu as catalyst (D). Time-dependent UV-vis absorption spectra over  $\text{Cu}/\text{Fe}_3\text{O}_4$  prepared at different dosage of Cu precursor:  $\text{Cu}_{0.1}/\text{Fe}_3\text{O}_4$  (E),  $\text{Cu}_{0.3}/\text{Fe}_3\text{O}_4$  (F),  $\text{Cu}_{0.5}/\text{Fe}_3\text{O}_4$  (G),  $\text{Cu}_{0.7}/\text{Fe}_3\text{O}_4$  (H),  $\text{Cu}_{1.3}/\text{Fe}_3\text{O}_4$  (I). (J) The relationship between  $\ln(A_t/A_0)$  and the reaction time under different conditions.

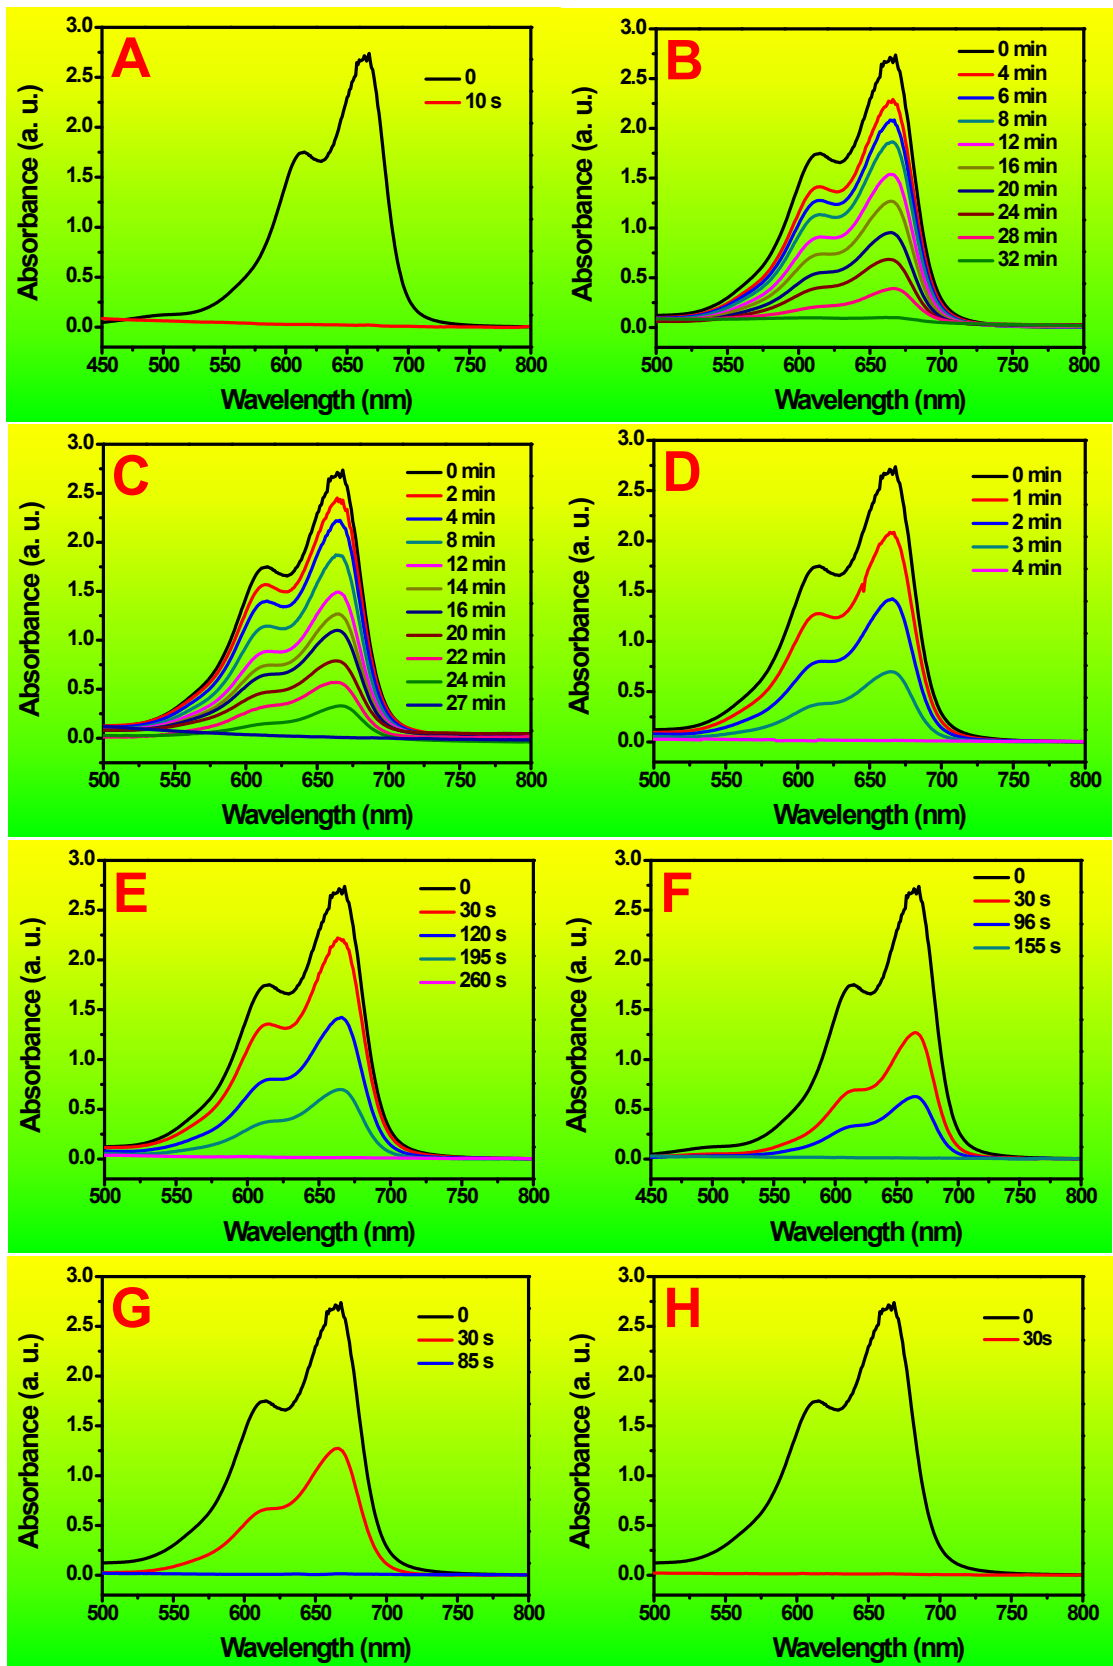

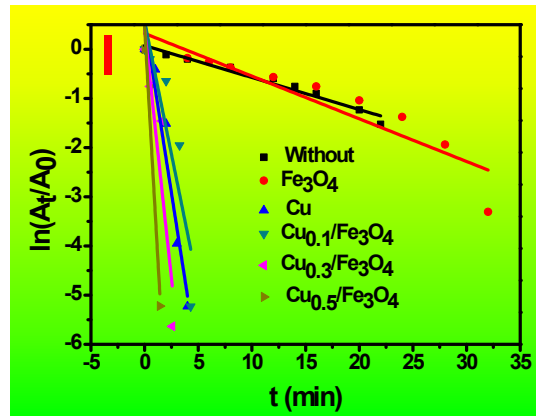

**Fig. S3** Time-dependent UV-vis absorption spectra of MB in the presence of Cu/Fe<sub>3</sub>O<sub>4</sub> (A); without catalyst (B); with Fe<sub>3</sub>O<sub>4</sub> as catalyst (C); with Cu as catalyst (D). Time-dependent UV-vis absorption spectra over Cu/Fe<sub>3</sub>O<sub>4</sub> prepared at different dosage of Cu precursor: Cu<sub>0.1</sub>/Fe<sub>3</sub>O<sub>4</sub> (E), Cu<sub>0.3</sub>/Fe<sub>3</sub>O<sub>4</sub> (F), Cu<sub>0.5</sub>/Fe<sub>3</sub>O<sub>4</sub> (G), Cu<sub>0.7</sub>/Fe<sub>3</sub>O<sub>4</sub> (H). (I) The relationship between  $\ln(A_t/A_0)$  and the reaction time under different conditions.

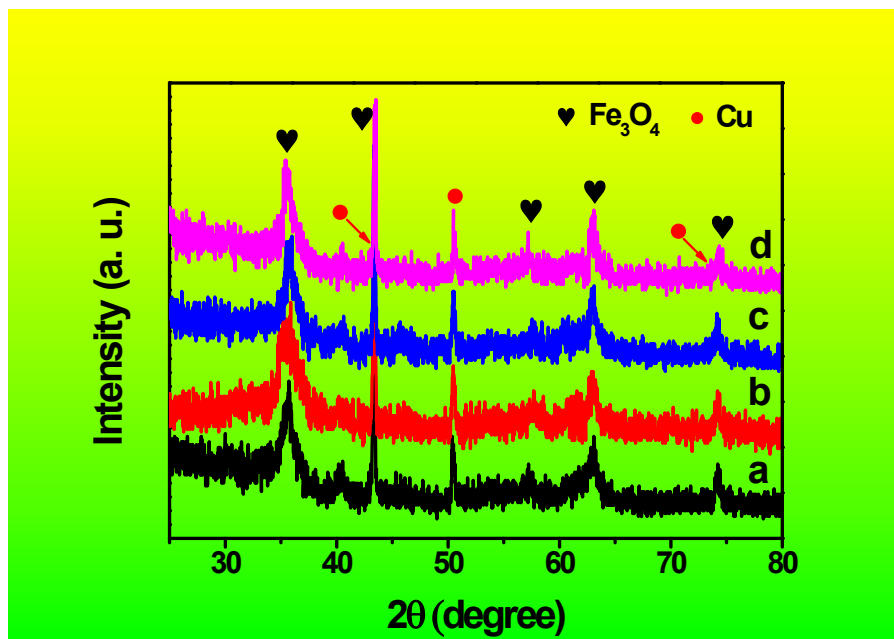

**Fig. S4** XRD patterns of Cu/Fe<sub>3</sub>O<sub>4</sub> before reaction (a) and after reused six times for 4-NP (b), CR (c), MB (d), respectively.
